# Supplementary material for: Prediction of Deleterious Non-Synonymous SNPs Based on Protein Interaction Network and Hybrid Properties
Source: PubMed Central journal article supplement (PMC2912763; doi:10.1371/journal.pone.0011900), 2010-07-30

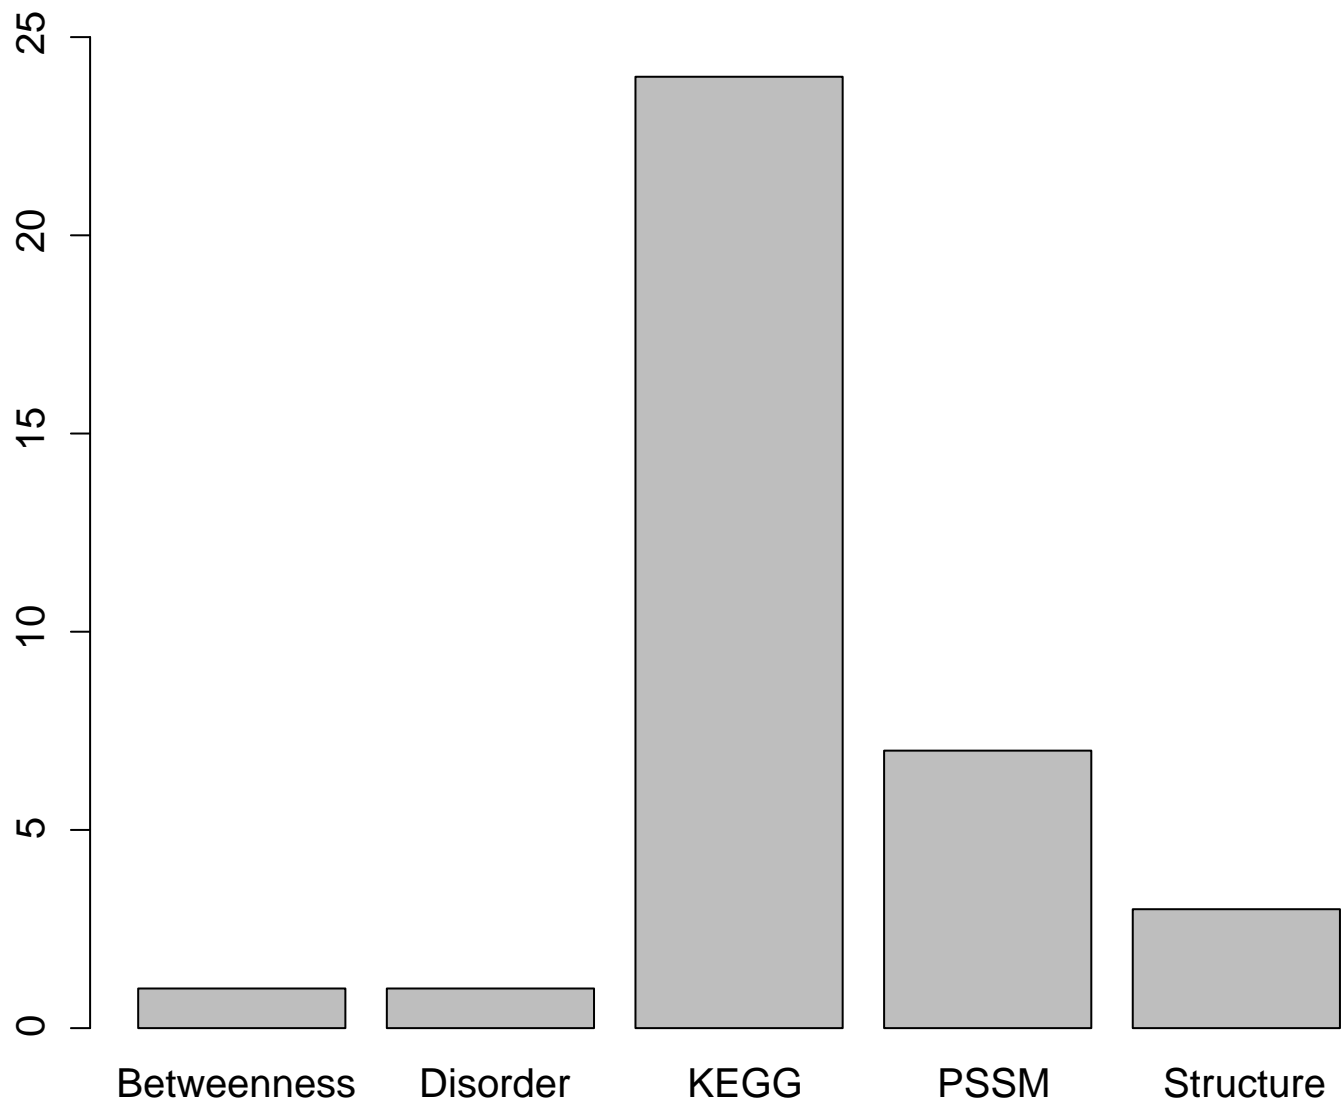

Supplement: pone.0011900.s003.pdf [file pone.0011900.s003.pdf]
