# Supplementary material for: Prediction of Deleterious Non-Synonymous SNPs Based on Protein Interaction Network and Hybrid Properties
Source: PLoS One. 2010 Jul 30;5(7):e11900. doi: 10.1371/journal.pone.0011900 (PMC2912763; doi:10.1371/journal.pone.0011900)
Supplement: Table S1 — The IFS table. (0.03 MB XLS) [file pone.0011900.s001.xls]

## Sheet: Table S1
Table S1 – The IFS table
Index	Overall Accuracy	Accuracy of polymorphism SAP	Accuracy of disease SAP
1	0.55947	1	0
6	0.694731	0.718874	0.66407
11	0.741043	0.762291	0.714058
16	0.765199	0.781802	0.744112
21	0.770927	0.788515	0.748589
26	0.781681	0.799672	0.758832
31	0.792434	0.809765	0.770424
36	0.802891	0.818458	0.783121
41	0.805269	0.826186	0.778705
46	0.803783	0.823481	0.778766
51	0.808133	0.82662	0.784654
56	0.813132	0.832464	0.788579
61	0.818941	0.837632	0.795204
66	0.818157	0.835313	0.796369
71	0.820967	0.836714	0.800969
76	0.819643	0.83541	0.79962
81	0.822102	0.840046	0.799313
86	0.821075	0.839708	0.797412
91	0.821156	0.838791	0.798761
96	0.823048	0.840916	0.800356
101	0.82375	0.842123	0.800417
106	0.823777	0.842751	0.799681
111	0.825399	0.844972	0.80054
116	0.824858	0.842461	0.802502
121	0.828452	0.846856	0.805079
126	0.824291	0.843427	0.799988
131	0.825534	0.8456	0.800049
136	0.826074	0.846614	0.799988
141	0.826101	0.844055	0.8033
146	0.82529	0.8442	0.801276
151	0.826047	0.843765	0.803545
156	0.826236	0.843186	0.804711
161	0.827479	0.844007	0.806489
166	0.826371	0.841543	0.807103
171	0.82602	0.842654	0.804895
176	0.827344	0.843524	0.806796
181	0.830262	0.847049	0.808943
186	0.829668	0.847387	0.807164
191	0.828668	0.845842	0.806857
196	0.827911	0.845455	0.805631
201	0.82983	0.847725	0.807103
206	0.829262	0.847918	0.805569
211	0.828911	0.847001	0.805937
216	0.830235	0.847484	0.808329
221	0.829857	0.847339	0.807655
226	0.830667	0.84816	0.808452
231	0.830127	0.848546	0.806735
236	0.830424	0.848208	0.807839
241	0.830019	0.847918	0.807287
246	0.829992	0.84845	0.806551
251	0.830748	0.84985	0.806489
256	0.832018	0.851444	0.807348
257	0.832397	0.85212	0.807348
258	0.832316	0.852168	0.807103
259	0.831937	0.851686	0.806857
260	0.832045	0.851927	0.806796
261	0.832397	0.852555	0.806796
262	0.832559	0.852651	0.807041
263	0.832667	0.852603	0.807348
264	0.831532	0.851734	0.805876
265	0.831613	0.851927	0.805815
266	0.831694	0.851975	0.805937
271	0.829397	0.849078	0.804404
276	0.829506	0.848498	0.805385
281	0.828128	0.847677	0.8033
286	0.829668	0.85043	0.8033
291	0.829911	0.850526	0.803729
296	0.831505	0.852024	0.805447
301	0.831883	0.852313	0.805937
306	0.831316	0.851396	0.805815
311	0.831343	0.850961	0.806428
316	0.831181	0.851444	0.805447
321	0.831208	0.851058	0.805999
326	0.830478	0.851009	0.804404
331	0.831613	0.851879	0.805876
336	0.829938	0.850092	0.804343
341	0.829992	0.849657	0.805017
346	0.830965	0.850913	0.805631
351	0.829073	0.84956	0.803054
356	0.829343	0.851203	0.801582
361	0.828776	0.850671	0.800969
366	0.828398	0.850237	0.800662
371	0.828992	0.850768	0.801337
376	0.828101	0.850526	0.79962
381	0.827371	0.849174	0.799681
386	0.826209	0.847484	0.79919
391	0.826371	0.847532	0.799497
396	0.825561	0.845359	0.800417
401	0.825939	0.845987	0.800478
406	0.824858	0.84589	0.798148
411	0.824534	0.844683	0.798945
416	0.824804	0.845649	0.798332
421	0.822643	0.843765	0.795817
426	0.822616	0.843379	0.796246
431	0.821832	0.843572	0.794222
436	0.821805	0.843089	0.794774
441	0.821481	0.842992	0.794161
446	0.820427	0.841447	0.793732
451	0.81967	0.840964	0.792628
456	0.820049	0.840867	0.793609
461	0.818265	0.838694	0.792321
466	0.8184	0.839177	0.792014
471	0.818482	0.839177	0.792198
