# Supplementary material for: Prediction of Deleterious Non-Synonymous SNPs Based on Protein Interaction Network and Hybrid Properties
Source: PLoS One. 2010 Jul 30;5(7):e11900. doi: 10.1371/journal.pone.0011900 (PMC2912763; doi:10.1371/journal.pone.0011900)
Supplement: Table S2 — The optimized 263 features. (0.05 MB XLS) [file pone.0011900.s002.xls]

## Sheet: Table S2
Table S2 - The optimized 263 features
Order	Name	Type of feature	PSSM	KEGG
1	kegg.154	kegg		hsa04350_TGF-beta signaling pathway
2	site.3.disorder	disorder
3	site.5.pssm.17	pssm	T
4	grantham	structure
5	kegg.91	kegg		hsa00790_Folate biosynthesis
6	kegg.152	kegg		hsa04330_Notch signaling pathway
7	kegg.185	kegg		hsa04916_Melanogenesis
8	kegg.115	kegg		hsa01066_Biosynthesis of alkaloids derived from terpenoid and polyketide
9	site.5.pssm.2	pssm	R
10	metal	structure
11	kegg.84	kegg		hsa00730_Thiamine metabolism
12	kegg.78	kegg		hsa00643_Styrene degradation
13	kegg.68	kegg		hsa00603_Glycosphingolipid biosynthesis - globo series
14	kegg.23	kegg		hsa00270_Cysteine and methionine metabolism
15	kegg.198	kegg		hsa05200_Pathways in cancer
16	site.5.pssm.1	pssm	A
17	kegg.104	kegg		hsa00965_Betalain biosynthesis
18	site.5.pssm.13	pssm	M
19	kegg.100	kegg		hsa00930_Caprolactam degradation
20	betweenness	betweenness
21	kegg.85	kegg		hsa00740_Riboflavin metabolism
22	site.2.pssm.2	pssm	R
23	kegg.219	kegg		hsa05410_Hypertrophic cardiomyopathy (HCM)
24	site.8.pssm.7	pssm	E
25	kegg.189	kegg		hsa04950_Maturity onset diabetes of the young
26	kegg.3	kegg		hsa00030_Pentose phosphate pathway
27	kegg.34	kegg		hsa00363_Bisphenol A degradation
28	is.HLA	structure
29	kegg.144	kegg		hsa04142_Lysosome
30	kegg.210	kegg		hsa05221_Acute myeloid leukemia
31	site.5.pssm.16	pssm	S
32	kegg.206	kegg		hsa05217_Basal cell carcinoma
33	kegg.47	kegg		hsa00500_Starch and sucrose metabolism
34	kegg.159	kegg		hsa04514_Cell adhesion molecules (CAMs)
35	kegg.180	kegg		hsa04740_Olfactory transduction
36	kegg.82	kegg		hsa00710_Carbon fixation in photosynthetic organisms
37	site.2.pssm.1	pssm	A
38	kegg.101	kegg		hsa00940_Phenylpropanoid biosynthesis
39	site.5.pssm.6	pssm	Q
40	kegg.176	kegg		hsa04710_Circadian rhythm - mammal
41	site.9.disorder	disorder
42	site.5.pssm.5	pssm	C
43	kegg.209	kegg		hsa05220_Chronic myeloid leukemia
44	site.5.pssm.19	pssm	Y
45	kegg.54	kegg		hsa00531_Glycosaminoglycan degradation
46	kegg.102	kegg		hsa00950_Isoquinoline alkaloid biosynthesis
47	kegg.2	kegg		hsa00020_Citrate cycle (TCA cycle)
48	site.9.pssm.17	pssm	T
49	kegg.15	kegg		hsa00140_C21-Steroid hormone metabolism
50	site.1.pssm.7	pssm	E
51	kegg.95	kegg		hsa00900_Terpenoid backbone biosynthesis
52	kegg.131	kegg		hsa03450_Non-homologous end-joining
53	kegg.153	kegg		hsa04340_Hedgehog signaling pathway
54	kegg.61	kegg		hsa00564_Glycerophospholipid metabolism
55	site.3.pssm.2	pssm	R
56	kegg.6	kegg		hsa00052_Galactose metabolism
57	kegg.181	kegg		hsa04742_Taste transduction
58	kegg.211	kegg		hsa05222_Small cell lung cancer
59	site.5.pssm.15	pssm	P
60	kegg.44	kegg		hsa00471_D-Glutamine and D-glutamate metabolism
61	kegg.109	kegg		hsa01040_Biosynthesis of unsaturated fatty acids
62	site.8.pssm.17	pssm	T
63	site.2.pssm.7	pssm	E
64	site.5.pssm.20	pssm	V
65	kegg.14	kegg		hsa00130_Ubiquinone and other terpenoid-quinone biosynthesis
66	kegg.69	kegg		hsa00604_Glycosphingolipid biosynthesis - ganglio series
67	kegg.89	kegg		hsa00780_Biotin metabolism
68	kegg.141	kegg		hsa04120_Ubiquitin mediated proteolysis
69	kegg.148	kegg		hsa04260_Cardiac muscle contraction
70	site.5.pssm.7	pssm	E
71	kegg.199	kegg		hsa05210_Colorectal cancer
72	kegg.52	kegg		hsa00520_Amino sugar and nucleotide sugar metabolism
73	site.7.pssm.2	pssm	R
74	site.4.pssm.16	pssm	S
75	var.aafactor.4	aafactor
76	act	structure
77	kegg.111	kegg		hsa01062_Biosynthesis of terpenoids and steroids
78	in.disorder	disorder
79	site.6.pssm.17	pssm	T
80	kegg.39	kegg		hsa00410_beta-Alanine metabolism
81	kegg.146	kegg		hsa04150_mTOR signaling pathway
82	kegg.220	kegg		hsa05412_Arrhythmogenic right ventricular cardiomyopathy (ARVC)
83	site.2.pssm.17	pssm	T
84	binding	structure
85	kegg.62	kegg		hsa00565_Ether lipid metabolism
86	kegg.37	kegg		hsa00400_Phenylalanine, tyrosine and tryptophan biosynthesis
87	site.1.disorder	disorder
88	kegg.11	kegg		hsa00072_Synthesis and degradation of ketone bodies
89	kegg.201	kegg		hsa05212_Pancreatic cancer
90	site.9.pssm.2	pssm	R
91	kegg.49	kegg		hsa00511_Other glycan degradation
92	site.5.pssm.11	pssm	L
93	kegg.74	kegg		hsa00630_Glyoxylate and dicarboxylate metabolism
94	kegg.213	kegg		hsa05310_Asthma
95	site.8.pssm.16	pssm	S
96	kegg.129	kegg		hsa03430_Mismatch repair
97	site.5.pssm.12	pssm	K
98	kegg.105	kegg		hsa00970_Aminoacyl-tRNA biosynthesis
99	kegg.63	kegg		hsa00590_Arachidonic acid metabolism
100	site.3.pssm.16	pssm	S
101	kegg.50	kegg		hsa00512_O-Glycan biosynthesis
102	kegg.5	kegg		hsa00051_Fructose and mannose metabolism
103	site.2.pssm.10	pssm	I
104	site.1.pssm.1	pssm	A
105	kegg.71	kegg		hsa00624_1- and 2-Methylnaphthalene degradation
106	site.4.pssm.2	pssm	R
107	kegg.66	kegg		hsa00600_Sphingolipid metabolism
108	kegg.21	kegg		hsa00250_Alanine, aspartate and glutamate metabolism
109	kegg.140	kegg		hsa04115_p53 signaling pathway
110	kegg.55	kegg		hsa00532_Chondroitin sulfate biosynthesis
111	kegg.24	kegg		hsa00280_Valine, leucine and isoleucine degradation
112	kegg.51	kegg		hsa00514_O-Mannosyl glycan biosynthesis
113	kegg.122	kegg		hsa03022_Basal transcription factors
114	site.6.pssm.7	pssm	E
115	kegg.188	kegg		hsa04940_Type I diabetes mellitus
116	site.5.pssm.8	pssm	G
117	kegg.212	kegg		hsa05223_Non-small cell lung cancer
118	site.7.pssm.16	pssm	S
119	kegg.8	kegg		hsa00061_Fatty acid biosynthesis
120	site.1.pssm.2	pssm	R
121	kegg.58	kegg		hsa00561_Glycerolipid metabolism
122	site.4.aafactor.3	aafactor
123	kegg.98	kegg		hsa00910_Nitrogen metabolism
124	site.8.pssm.6	pssm	Q
125	site.2.pssm.16	pssm	S
126	var.aafactor.3	aafactor
127	kegg.116	kegg		hsa01070_Biosynthesis of plant hormones
128	kegg.103	kegg		hsa00960_Tropane, piperidine and pyridine alkaloid biosynthesis
129	kegg.132	kegg		hsa04010_MAPK signaling pathway
130	site.8.pssm.13	pssm	M
131	kegg.118	kegg		hsa02010_ABC transporters
132	site.7.disorder	disorder
133	kegg.90	kegg		hsa00785_Lipoic acid metabolism
134	site.1.pssm.17	pssm	T
135	kegg.124	kegg		hsa03050_Proteasome
136	kegg.202	kegg		hsa05213_Endometrial cancer
137	site.8.pssm.1	pssm	A
138	site.5.pssm.14	pssm	F
139	kegg.38	kegg		hsa00401_Novobiocin biosynthesis
140	kegg.195	kegg		hsa05110_Vibrio cholerae infection
141	site.3.aafactor.3	aafactor
142	site.7.pssm.14	pssm	F
143	kegg.43	kegg		hsa00460_Cyanoamino acid metabolism
144	kegg.75	kegg		hsa00632_Benzoate degradation via CoA ligation
145	site.9.pssm.20	pssm	V
146	kegg.112	kegg		hsa01063_Biosynthesis of alkaloids derived from shikimate pathway
147	kegg.197	kegg		hsa05130_Pathogenic Escherichia coli infection - EHEC
148	site.6.aafactor.3	aafactor
149	kegg.64	kegg		hsa00591_Linoleic acid metabolism
150	lipid	structure
151	site.5.aafactor.5	aafactor
152	site.2.pssm.6	pssm	Q
153	kegg.123	kegg		hsa03030_DNA replication
154	kegg.217	kegg		hsa05332_Graft-versus-host disease
155	kegg.40	kegg		hsa00430_Taurine and hypotaurine metabolism
156	site.4.pssm.1	pssm	A
157	site.2.pssm.13	pssm	M
158	kegg.190	kegg		hsa05010_Alzheimer's disease
159	site.9.pssm.7	pssm	E
160	kegg.53	kegg		hsa00521_Streptomycin biosynthesis
161	kegg.208	kegg		hsa05219_Bladder cancer
162	site.3.pssm.7	pssm	E
163	site.1.aafactor.3	aafactor
164	kegg.9	kegg		hsa00062_Fatty acid elongation in mitochondria
165	site.6.pssm.1	pssm	A
166	crosslnk	structure
167	kegg.32	kegg		hsa00360_Phenylalanine metabolism
168	site.4.pssm.7	pssm	E
169	kegg.164	kegg		hsa04612_Antigen processing and presentation
170	kegg.41	kegg		hsa00440_Aminophosphonate metabolism
171	site.5.pssm.10	pssm	I
172	kegg.110	kegg		hsa01061_Biosynthesis of phenylpropanoids
173	kegg.119	kegg		hsa03010_Ribosome
174	site.9.pssm.1	pssm	A
175	kegg.150	kegg		hsa04310_Wnt signaling pathway
176	var.aafactor.2	aafactor
177	kegg.143	kegg		hsa04140_Regulation of autophagy
178	site.2.disorder	disorder
179	kegg.86	kegg		hsa00750_Vitamin B6 metabolism
180	kegg.81	kegg		hsa00680_Methane metabolism
181	kegg.59	kegg		hsa00562_Inositol phosphate metabolism
182	site.7.pssm.5	pssm	C
183	kegg.73	kegg		hsa00627_1,4-Dichlorobenzene degradation
184	site.8.pssm.12	pssm	K
185	kegg.33	kegg		hsa00361_gamma-Hexachlorocyclohexane degradation
186	kegg.25	kegg		hsa00281_Geraniol degradation
187	kegg.204	kegg		hsa05215_Prostate cancer
188	kegg.35	kegg		hsa00364_Fluorobenzoate degradation
189	site.7.aafactor.3	aafactor
190	site.2.pssm.19	pssm	Y
191	kegg.72	kegg		hsa00625_Tetrachloroethene degradation
192	site.3.pssm.20	pssm	V
193	site.1.pssm.16	pssm	S
194	kegg.165	kegg		hsa04614_Renin-angiotensin system
195	site.2.aafactor.3	aafactor
196	site.5.pssm.3	pssm	N
197	kegg.192	kegg		hsa05014_Amyotrophic lateral sclerosis (ALS)
198	site.8.pssm.19	pssm	Y
199	kegg.161	kegg		hsa04530_Tight junction
200	site.2.pssm.12	pssm	K
201	kegg.83	kegg		hsa00720_Reductive carboxylate cycle (CO2 fixation)
202	kegg.186	kegg		hsa04920_Adipocytokine signaling pathway
203	site.6.pssm.2	pssm	R
204	kegg.120	kegg		hsa03018_RNA degradation
205	site.4.pssm.13	pssm	M
206	site.1.pssm.5	pssm	C
207	kegg.139	kegg		hsa04110_Cell cycle
208	kegg.36	kegg		hsa00380_Tryptophan metabolism
209	site.9.aafactor.3	aafactor
210	site.7.pssm.7	pssm	E
211	kegg.92	kegg		hsa00791_Atrazine degradation
212	site.3.pssm.17	pssm	T
213	site.5.disorder	disorder
214	kegg.200	kegg		hsa05211_Renal cell carcinoma
215	kegg.27	kegg		hsa00300_Lysine biosynthesis
216	site.5.pssm.9	pssm	H
217	kegg.67	kegg		hsa00601_Glycosphingolipid biosynthesis - lacto and neolacto series
218	kegg.45	kegg		hsa00472_D-Arginine and D-ornithine metabolism
219	kegg.125	kegg		hsa03060_Protein export
220	kegg.88	kegg		hsa00770_Pantothenate and CoA biosynthesis
221	site.8.pssm.20	pssm	V
222	site.1.pssm.13	pssm	M
223	kegg.12	kegg		hsa00100_Steroid biosynthesis
224	kegg.76	kegg		hsa00640_Propanoate metabolism
225	kegg.167	kegg		hsa04622_RIG-I-like receptor signaling pathway
226	site.5.pssm.18	pssm	W
227	kegg.155	kegg		hsa04360_Axon guidance
228	site.2.pssm.5	pssm	C
229	site.4.pssm.17	pssm	T
230	kegg.130	kegg		hsa03440_Homologous recombination
231	site.9.pssm.8	pssm	G
232	kegg.22	kegg		hsa00260_Glycine, serine and threonine metabolism
233	site.6.pssm.13	pssm	M
234	site.8.pssm.5	pssm	C
235	kegg.48	kegg		hsa00510_N-Glycan biosynthesis
236	site.2.pssm.15	pssm	P
237	kegg.191	kegg		hsa05012_Parkinson's disease
238	site.7.pssm.20	pssm	V
239	kegg.19	kegg		hsa00232_Caffeine metabolism
240	site.6.pssm.16	pssm	S
241	kegg.215	kegg		hsa05322_Systemic lupus erythematosus
242	kegg.142	kegg		hsa04130_SNARE interactions in vesicular transport
243	kegg.113	kegg		hsa01064_Biosynthesis of alkaloids derived from ornithine, lysine and nicotinic acid
244	site.4.pssm.5	pssm	C
245	kegg.135	kegg		hsa04060_Cytokine-cytokine receptor interaction
246	site.8.disorder	disorder
247	kegg.207	kegg		hsa05218_Melanoma
248	kegg.31	kegg		hsa00350_Tyrosine metabolism
249	site.4.aafactor.2	aafactor
250	kegg.127	kegg		hsa03410_Base excision repair
251	site.3.pssm.14	pssm	F
252	kegg.79	kegg		hsa00650_Butanoate metabolism
253	site.6.pssm.5	pssm	C
254	site.9.pssm.13	pssm	M
255	site.8.aafactor.3	aafactor
256	kegg.214	kegg		hsa05320_Autoimmune thyroid disease
257	kegg.57	kegg		hsa00534_Heparan sulfate biosynthesis
258	kegg.149	kegg		hsa04270_Vascular smooth muscle contraction
259	site.1.pssm.6	pssm	Q
260	site.8.pssm.8	pssm	G
261	kegg.56	kegg		hsa00533_Keratan sulfate biosynthesis
262	kegg.121	kegg		hsa03020_RNA polymerase
263	kegg.60	kegg		hsa00563_Glycosylphosphatidylinositol(GPI)-anchor biosynthesis
